# Supplementary material for: A Coumarin–Hemicyanine Deep Red Dye with a Large Stokes Shift for the Fluorescence Detection and Naked-Eye Recognition of Cyanide
Source: MDPI journal article supplement (doi:10.3390/molecules29030618), 2024-01-27
Supplement: s1 [file s1]

# A Coumarin-Hemicyanine Near-Infrared Dye with a Large Stokes Shift for the Fluorescence Detection of Cyanide and Naked-Eye Recognition

Dongmei Li<sup>1</sup>, Senlin Peng<sup>1</sup>, Xu Zhou<sup>1</sup>, Lingyi Shen<sup>1</sup>, Xianjiong Yang<sup>1</sup>, Hong Xu<sup>1,\*</sup>, Carl Redshaw<sup>2</sup>, Qilong Zhang<sup>1,\*</sup>

- 1 School of Basic Medical Science, Guizhou Medical University, Guiyang 550004, China. Email: shenly@stumail.nwu.edu.cn (L.Y.S); sciqlzhang@gmc.edu.cn (Q.L.Z) ; yangxianjiong@126.com (X.J.Y); ylh6401@gmc.edu.cn (Y.L.H); xuhong@gmc.edu.cn (H.X.).
- 2 Chemistry, School of Natural Sciences, University of Hull, Cottingham Road, Hull, Yorkshire HU6 7RX, UK. mail: c.redshaw@hull.ac.uk (C.R.).
- \* Correspondence: xuhong@gmc.edu.cn (H.X.); Fax: +86-851-8817-4017 (H.X.); gzuqlzhang@126.com (Q.L.Z.); Fax: +86-851-8817-4017 (H.X.)

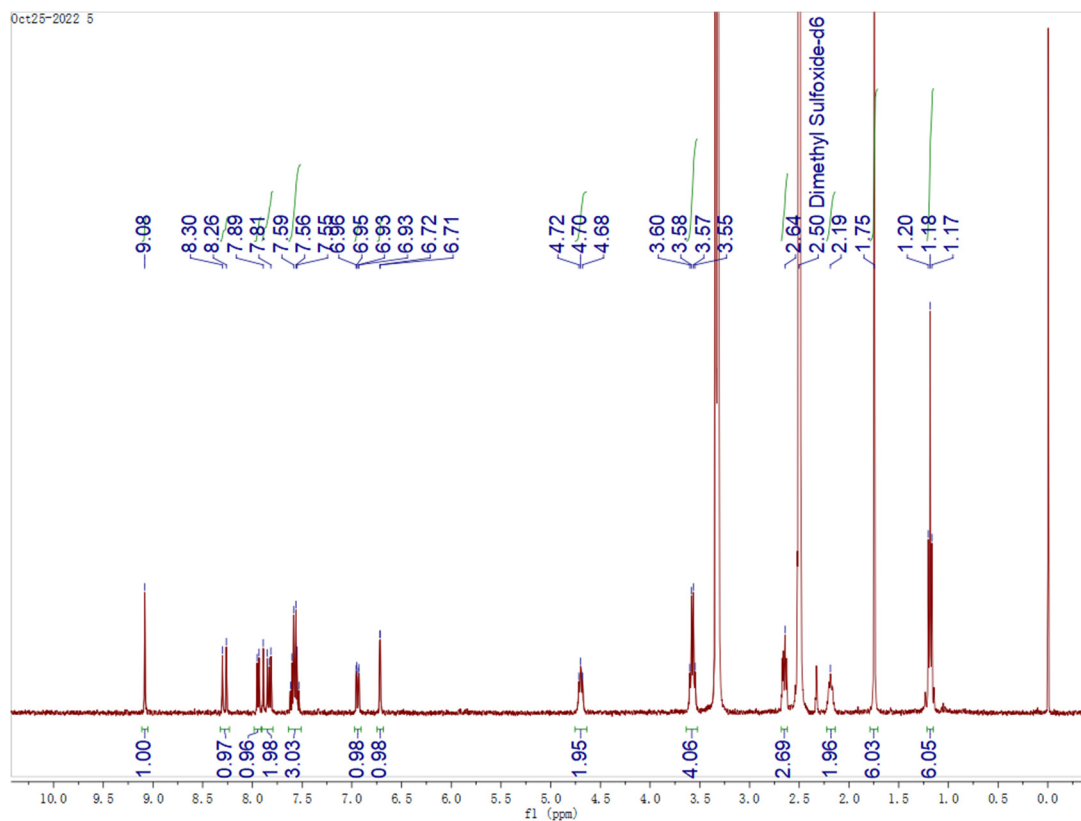

Figure S1.  $^1\text{H}$  NMR spectrum of probe W

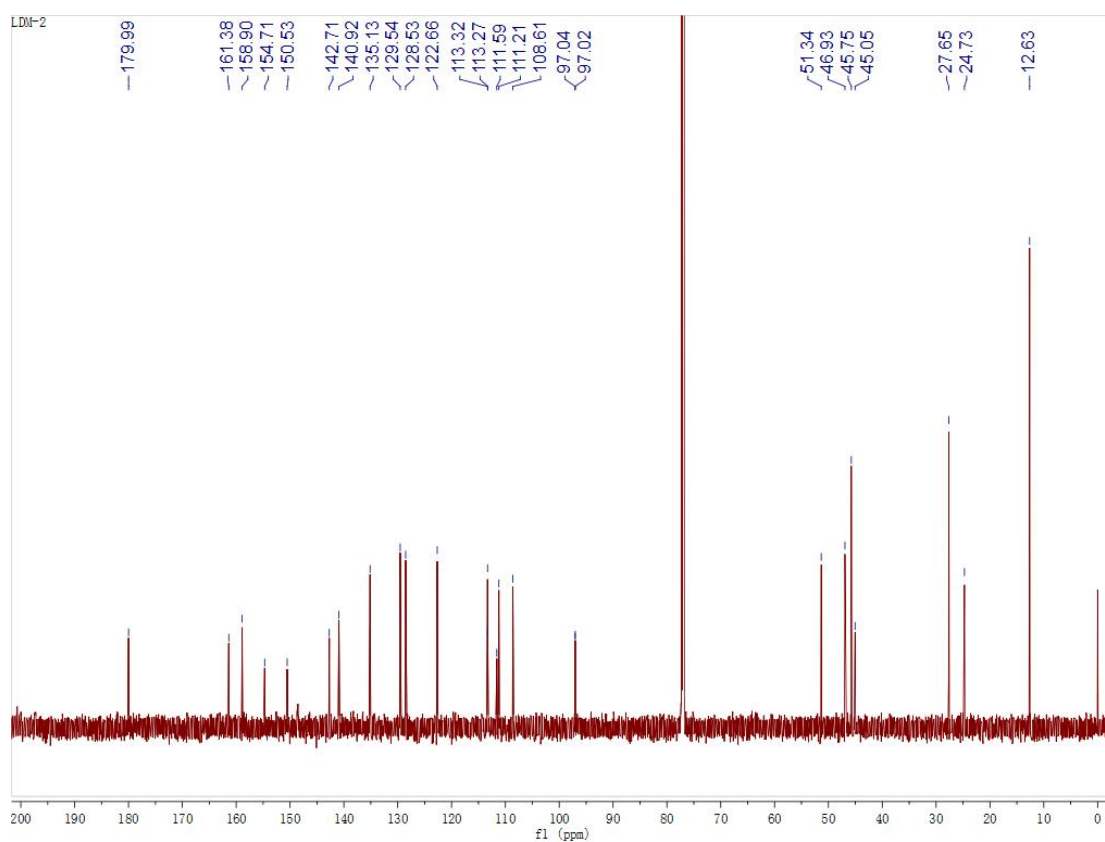

Figure S2.  $^{13}\text{C}$  NMR spectrum of probe W

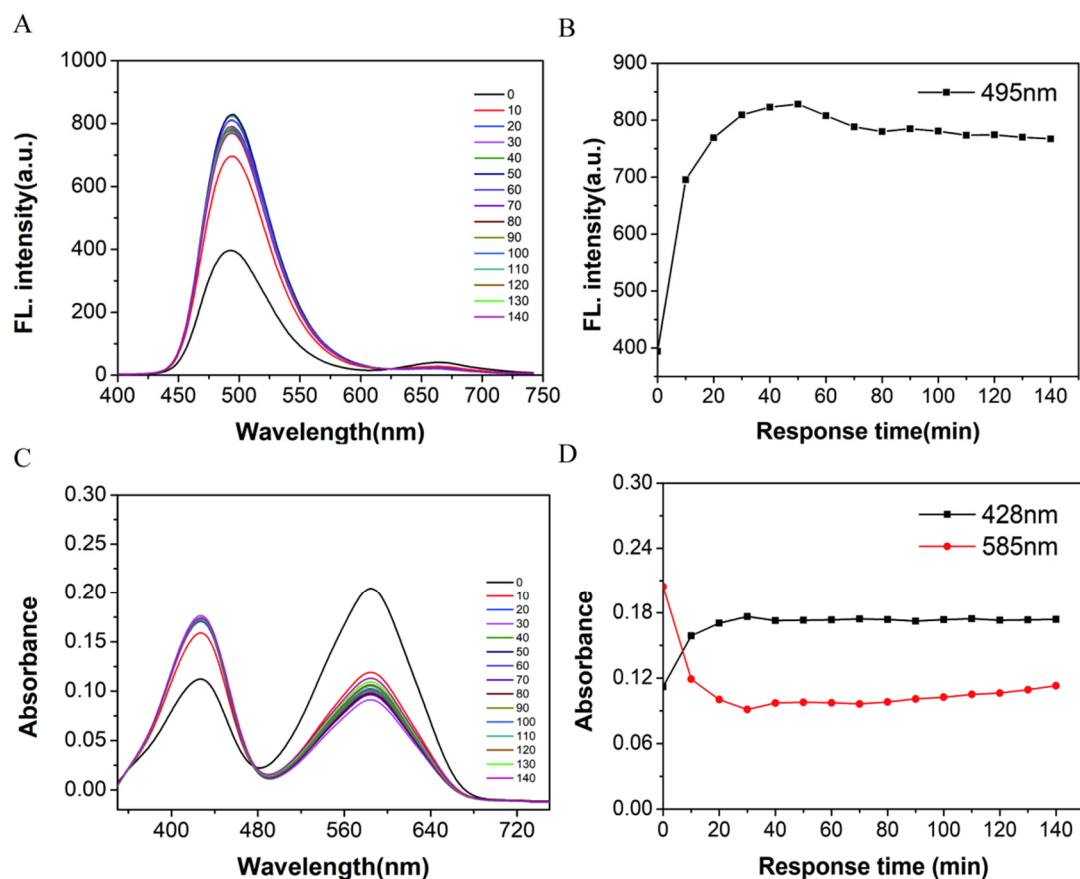

Figure S3. Time-varying fluorescence spectra (A) of probe W-CN<sup>-</sup> solution in dimethyl sulfoxide/water ( $V_{\text{DMSO}}:V_{\text{H}_2\text{O}}=1:4$ ,  $1.00 \times 10^{-2} \text{ mol/L}$  PBS buffer) detection system; changes in fluorescence intensities of probe W-CN<sup>-</sup> solution over time at the maximum emission at  $\lambda_{em}=495\text{nm}$ , slit. 5/5nm, voltage: 700V (B); UV-Vis absorption spectra (C) and the effect of time-dependent UV-visible absorbance of probe W-CN<sup>-</sup> solution at  $\lambda=428/585\text{nm}$  (D).

Table S1. Summary of crystal data for W

| Parameter                                          | W                                                               |
|----------------------------------------------------|-----------------------------------------------------------------|
| Empirical formula                                  | C <sub>28</sub> H <sub>32</sub> N <sub>2</sub> O <sub>5</sub> S |
| Formula weight [g mol <sup>-1</sup> ]              | 508.61                                                          |
| Crystal system                                     | monoclinic                                                      |
| Space group                                        | <i>P</i> 2 <sub>1</sub> / <i>n</i>                              |
| <i>a</i> [Å]                                       | 16.317(3)                                                       |
| <i>b</i> [Å]                                       | 7.8841(17)                                                      |
| <i>c</i> [Å]                                       | 20.827(4)                                                       |
| $\alpha$                                           | 90.00°                                                          |
| $\beta$                                            | 104.707(9)                                                      |
| $\gamma$                                           | 90.00°                                                          |
| Volume [Å <sup>3</sup> ]                           | 2591.6(9)                                                       |
| Z                                                  | 4                                                               |
| Density, calcd [gm <sup>-3</sup> ]                 | 1.304                                                           |
| Temperature [K]                                    | 300(2)                                                          |
| Unique reflns                                      | 2463                                                            |
| Obsd reflns                                        | 4564                                                            |
| Parameters                                         | 330                                                             |
| <i>R</i> <sub>int</sub>                            | 0.0774                                                          |
| <i>R</i> [ <i>I</i> > 2σ( <i>I</i> )] <sup>a</sup> | 0.0745                                                          |
| <i>W</i> [all data] <i>R</i> <sup>b</sup>          | 0.1679                                                          |
| GOF on <i>F</i> <sup>2</sup>                       | 1.060                                                           |

Table S2. Hydrogen-bonding geometries for compound W

| D—H...A                          | d(D...H)/nm | d(H...A)/nm | d(D...A)/nm | ∠D—H...A/ (°) |
|----------------------------------|-------------|-------------|-------------|---------------|
| C(10)—H(10B)—F(3) <sup>i</sup>   | 0.096       | 0.254       | 0.329 9(4)  | 137           |
| C(10)—H(10B)—F(4) <sup>i</sup>   | 0.096       | 0.243       | 0.337 8(4)  | 170           |
| C(3)—H(3)—F(1) <sup>ii</sup>     | 0.093       | 0.254       | 0.343 0(4)  | 161           |
| C(10)—H(10C)—O(2) <sup>iii</sup> | 0.096       | 0.257       | 0.337 9(4)  | 141           |
| C(18)—H(18A)—F(4) <sup>iii</sup> | 0.097       | 0.251       | 0.331 3(4)  | 140           |
| C(19)—H(19B)—F(2)                | 0.096       | 0.250       | 0.338 6(4)  | 153           |
| C25—H25B...O4 <sup>i</sup>       | 0.97        | 2.40        | 3.242 (6)   | 144.6         |
| C24—H24...O4 <sup>i</sup>        | 0.93        | 2.40        | 3.306 (5)   | 164.7         |
| C14—H14...O2 <sup>ii</sup>       | 0.93        | 2.43        | 3.348 (6)   | 171.0         |
| C3—H3A...O2 <sup>ii</sup>        | 0.97        | 2.62        | 3.458 (6)   | 145.0         |
| C1—H1B...O2 <sup>ii</sup>        | 0.97        | 2.48        | 3.347 (6)   | 149.4         |

Symmetry codes: i  $-x+1, -y, -z+1$ ; ii  $x-1, y, z$ ; iii  $x, -y+1/2, z+1$

**Table S3.** Comparison data with reported CN<sup>-</sup> sensors

| Structure                                                                                                 | Fluorescence | solvent                         | Detection limit     |
|-----------------------------------------------------------------------------------------------------------|--------------|---------------------------------|---------------------|
| 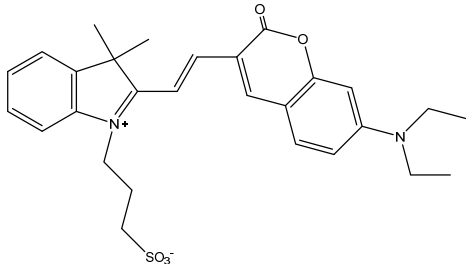<br><b>Our work</b>      | Turn-on      | DMSO/ H <sub>2</sub> O<br>(1:4) | 0.24 μM/<br>0.13 μM |
| <br><b>Probe R [2]</b>  | Turn-on      | DMSO/ H <sub>2</sub> O<br>(2:8) | 0.96 μM             |
| <br><b>Probe 1 [3]</b> | Turn-on      | DMF/H <sub>2</sub> O<br>(6:4)   | 0.23 μM             |
| <br><b>Q1-3 [4]</b>    | Turn-on      | DMSO/ H <sub>2</sub> O<br>(1:9) | 0.81 μM             |

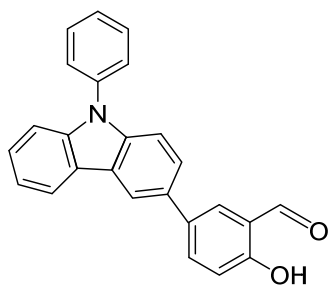

**CPHB [5]**

Turn-on

THF/ H<sub>2</sub>O  
(1:19)

0.249 μM

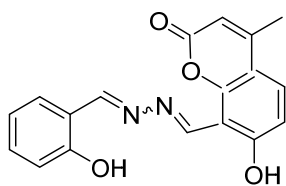

**YS [6]**

Turn-on

DMSO/ H<sub>2</sub>O  
(3:7)

0.17 μM

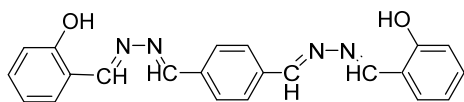

**L1 [7]**

Turn-on

DMSO/ H<sub>2</sub>O  
(4:1)

0.947 μM

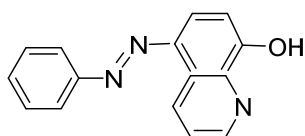

**AZQ [8]**

Turn-on

EtOH/ H<sub>2</sub>O  
(1:1)

2.6 μM

---

## References

1. Shi, Q; Wu, S.T; Shen, L.Y; Zhou, T; Xu, H; Wang, Z.Y; Yang, X.J; Huang, Y.L; Zhang, Q.L. A Turn-On Fluorescent Chemosensor for Cyanide Ion Detection in Real Water Samples. *Frontiers in chemistry*. 2022, 10:923149. doi:10.3389/fchem.2022.923149.
2. Kumar, P.S; Lakshmi, P.R; Elango, K.P. An easy to make chemoreceptor for the selective ratiometric fluorescent detection of cyanide in aqueous solution and in food materials. *New Journal of Chemistry*. 2019, 43(2), 675-680. doi:10.1039/C8NJ05587D.
3. Long, L.L; Yuan, X.Q; Cao, S.Y; Han, Y.Y; Liu, W.G; Chen, Q; Han, Z.X; Wang, K. Determination of Cyanide in Water and Food Samples Using an Efficient Naphthalene-Based Ratiometric Fluorescent Probe. *ACS Omega*. 2019, 4(6), 10784–10790. doi:10.1021/acsomega.9b01308.
4. Qu, W.J; Li, W.T; Zhang, H.L; Wei, T.B; Lin, Q; Yao, H; Zhang, Y.M. Rapid and Selective Detection of Cyanide Anion by Enhanced Fluorescent Emission and Colorimetric Color Changes at Micromole Levels in Aqueous Medium. *Journal of Heterocyclic Chemistry*. 2018, 155-124. doi:10.1002/jhet.3113.
5. Zhang, Y.X; Lu, L.Y; Pan, J.M; Liu, H; Ma, J. Preparation a novel phenylcarbazole-based fluorescent sensor for the sensitive and selective detection of CN<sup>-</sup> in water. *Materials Letters*. 2022, 313. DOI:10.1016/j.matlet.2022.131745.
6. Hu, J.H; Sun, Y; Qi, J; Li, Q; Wei, T.B. A new unsymmetrical azine derivative based on coumarin group as dual-modal sensor for CN<sup>-</sup> and fluorescent "OFF-ON" for Zn<sup>2+</sup>. *Spectrochimica acta. Part A, Molecular and biomolecular spectroscopy*. 2017, 175:125-133. doi:10.1016/j.saa.2016.12.009.
7. Pei, P.X; Hu, J.H; Chen, Y; Sun, Y; Qi, J. A novel dual-channel chemosensor for CN<sup>-</sup> using asymmetric double-azine derivatives in aqueous media and its application in bitter almond. *Spectrochimica Acta Part A: Molecular and Biomolecular Spectroscopy*. 2017, 181:131-136. doi: 10.1016/j.saa.2017.03.052.
8. Koc, O.K; Ozay, H. A simple azoquinoline based highly selective colorimetric sensor for CN<sup>-</sup> anion in aqueous media. *Canadian Journal of Chemistry*. 2017, 0163–. doi:10.1139/cjc-2017-0163.
